# Supplementary material for: Cyclin D1 unbalances the redox status controlling cell adhesion, migration, and drug resistance in myeloma cells
Source: PubMed Central journal article supplement (PMC5216717; doi:10.18632/oncotarget.9901), 2016-06-07
Supplement: oncotarget-07-45214-s001.pdf [file oncotarget-07-45214-s001.pdf]

## Cyclin D1 unbalances the redox status controlling cell adhesion, migration, and drug resistance in myeloma cells

### Supplementary Materials

#### SUPPLEMENTARY METHODS

Cellular oxygen consumption rate (OCR) measurements were obtained using a Seahorse XF96 Flux analyzer (Seahorse Bioscience). Experiments were performed according to the manufacturer's instructions. Briefly, cell lines were seeded with poly-D-lysine in XF96

cell culture plates at  $10^5$  cells/well. The XF96 sensor cartridges were hydrated overnight with 200  $\mu$ l Calibrant at pH7.4 and stored at 37°C without CO<sub>2</sub> for 24 h. The culture medium was replaced with XF BASE MEDIUM supplemented with glutamine (2 mM) and lacking bicarbonate (pH7.4). The cells were then incubated for 1 h at 37°C without CO<sub>2</sub> and measurements were performed.

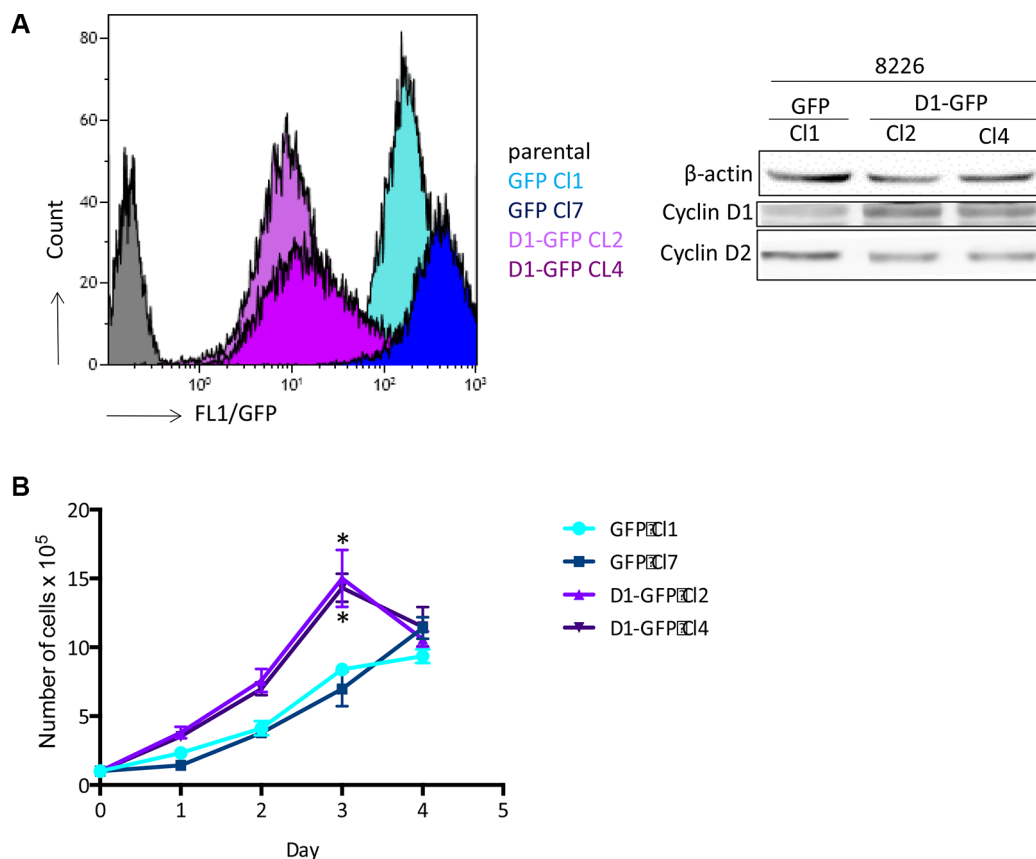

**Supplementary Figure S1: Characterization of GFP- and D1-GFP-expressing clones by flow cytometry and immunoblotting.** (A) 8226 parental cells were transfected with expression plasmids coding for GFP or cyclin D1-GFP proteins, and the resulting clones selected by antibiotic resistance. Two clones from each series (C11 and C17 for GFP-expressing cells and C12 and C14 for D1-GFP expressing cells) and parental cells were analyzed by flow cytometry for GFP staining (FL1). At least  $2 \times 10^4$  events were gated for each series. Representative profiles are shown on the graph. Proteins were purified from GFP- and D1-GFP-expressing cultured cells, separated on SDS-PAGE, blotted onto nitrocellulose membranes, and incubated with the indicated Abs. An anti  $\beta$ -actin Ab served as a loading and transfer control. (B) 8226 GFP- (C11 and C17) and D1-GFP- (C12 and C14) expressing cells were seeded in 24-well plates at the density of  $10^5$  cells/ml and cultured in complete medium. The cells were counted every day during a four-day period. The number of living cells was plotted as a function of time (day in culture). The experiment was carried out three times with triplicate samples. \* $p < 0.05$  with the *t*-test.

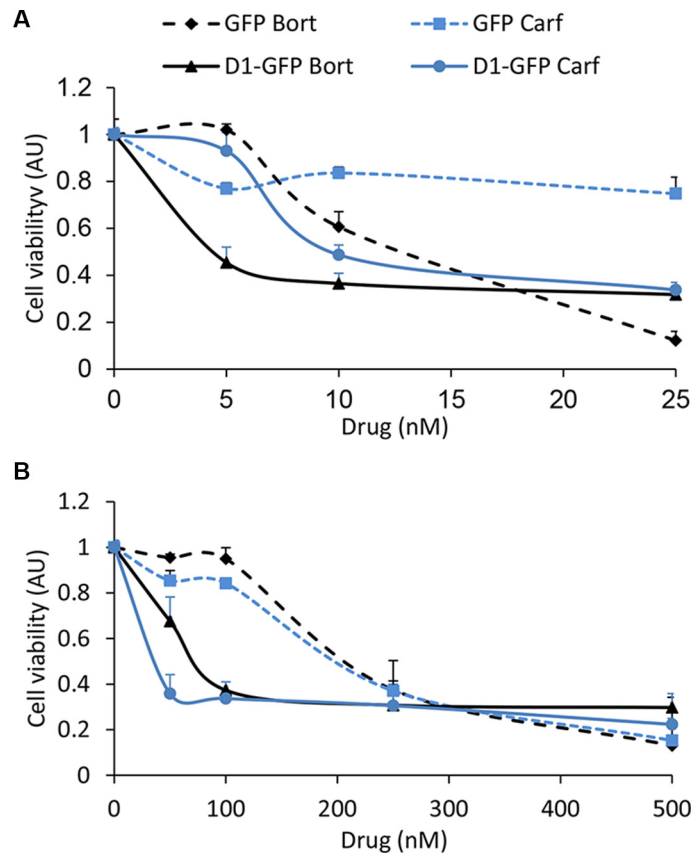

**Supplementary Figure S2: Effects of bortezomib and carfilzomib on cell viability assessed by a MTS assay.**  $5 \times 10^5$  GFP-expressing cells (C17, black diamonds and blue squares, dotted lines) and D1-GFP-expressing cells (C14, black triangles and blue circles, solid lines) were treated for 24 h (A) or 1 h (B) with bortezomib (black lines) or carfilzomib (blue lines) and cell viability was assessed by a MTS assay (here the CellTiter 96<sup>®</sup> AQ<sub>ueous</sub> One Solution Cell Proliferation Assay, Promega) according to the manufacturer's recommendations. The absorbance (OD at 490 nm) of each clone treated with the drug is expressed relative to that of the corresponding clone treated with vehicle (defined as 1 in arbitrary units, AU). For each set of culture conditions, the mean of triplicate ratios is indicated on the graph, together with SD.

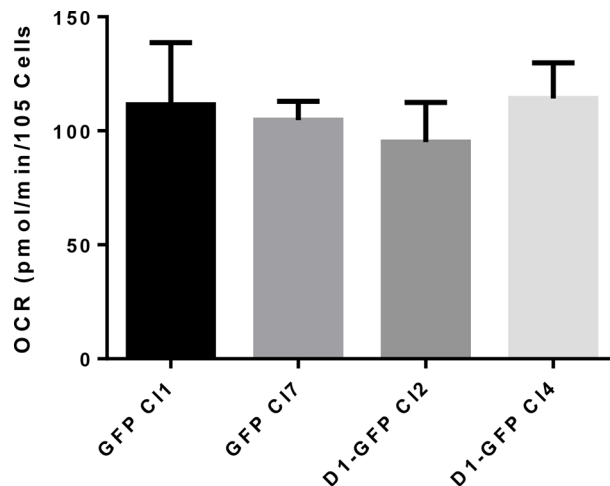

**Supplementary Figure S3: Effects of cyclin D1 expression on the cellular oxygen consumption rate.** OCRs (pmol/min/10<sup>5</sup> cells) were measured by a Seahorse Analyzer in GFP- (C11 and C17) and D1-GFP-expressing cells (C12 and C14). Basal measurements were normalized for cell concentration and the mean  $\pm$  SEM from four independent experiments are plotted.

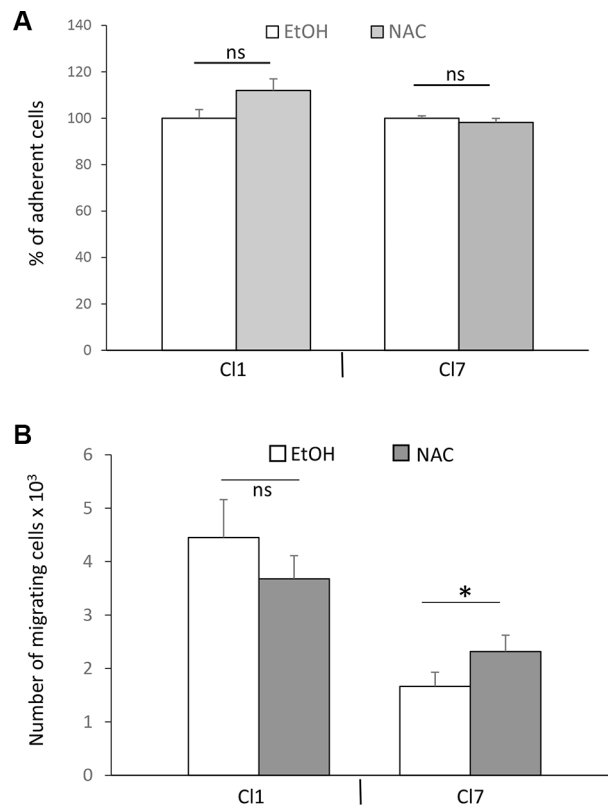

**Supplementary Figure S4: NAC treatment has no impact on adhesion and minor effect on migration.** GFP-expressing clones (C11 and C17) were treated with 1 mM NAC for 24 h and adhesion (**A**) and migration (**B**) assayed with the described protocols. ns, not significant; \* $p < 0.05$  by the *t*-test.

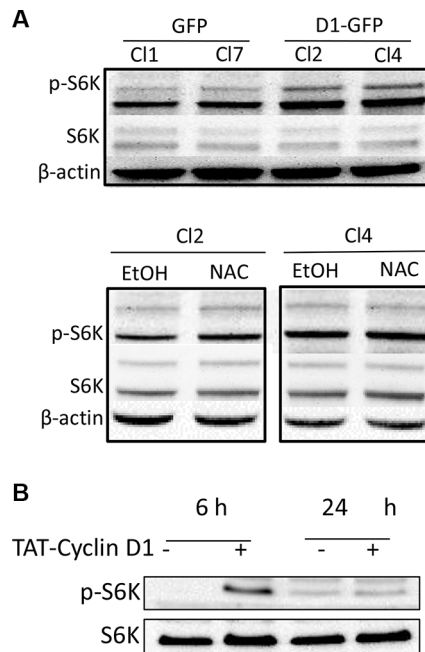

**Supplementary Figure S5: Cyclin D1 expression is accompanied by the activation of the S6K signaling pathway.** (**A**) *Upper panel*. Whole-cell protein extracts were obtained from cultured GFP and D1-GFP clones and separated by SDS-PAGE. The proteins were blotted and analyzed using the indicated Abs. An anti-β-actin Ab was used as a loading control. *Lower panel*. D1-GFP-expressing clones (C12 and C14) were treated with 1 mM NAC for 24 h (or vehicle as control) and harvested for protein purification and analysis after SDS-PAGE and immunoblotting as before with the indicated Abs. (**B**) TAT-cyclin D1 fusion protein was produced in bacteria, purified and directly added to the Ramos cell culture medium (or 0.9% NaCl as control) as previously described (Tchakarska *et al.*, Cancer Res. 2011;71,1690). The cells were harvested 3 or 24 h later for western blot analysis using the indicated Abs.

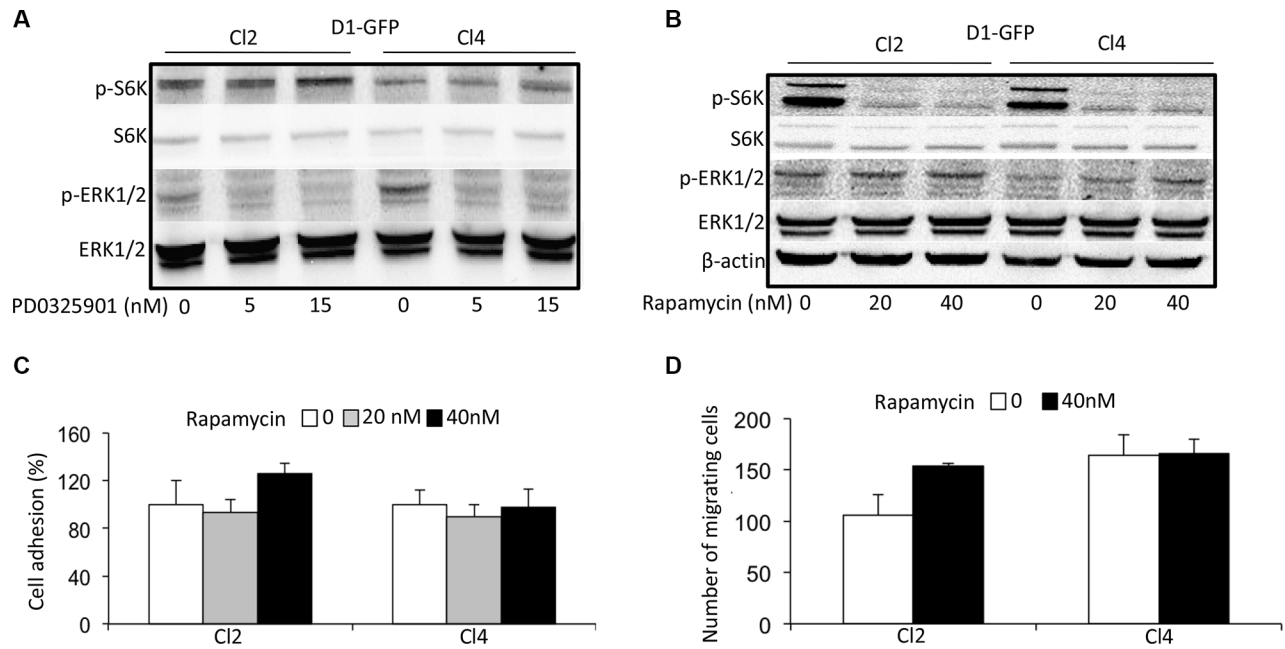

**Supplementary Figure S6: The inhibition of S6K by rapamycin has no effects on MM cell adhesion and migration.** Cyclin D1-expressing cells (D1-GFP CI2 and CI4) were treated with 5–15 nM PD0325901 or 20–40 nM rapamycin, or vehicle (0) for 24 h and the cells were analyzed by western blotting for S6K and ERK1/2 expression and activation (**A**) and (**B**), cell adhesion on HS-5 stromal cells (**C**) and chemotaxis (**D**).

**Supplementary Table S1: Sequences of the primers used for RT-PCR**

| Gene symbol               | Gene product                                | Primer sequences      |                             |
|---------------------------|---------------------------------------------|-----------------------|-----------------------------|
|                           |                                             | Forward               | Reverse                     |
| <i>CAT</i>                | Catalase                                    | cgcagttcggttctccac    | gggtcccgaactgtgtca          |
| <i>GAPDH</i>              | Glyceraldehyde dehydrogenase                | agccacatcgcctcagacac  | gccaatacagaccaaattcc        |
| <i>GLRX(1 &amp; 2)</i>    | Glutaredoxin 1 (thioltransferase)           | ggcttcggaattgtcgat    | tgcaccccratacaaatctt        |
| <i>GLRX2 (1)</i>          | Glutaredoxin 2, variant 1                   | gtggcactcgcctggaatc   | cgctgctaaattctcaaagat       |
| <i>GLRX2 (2)</i>          | Glutaredoxin 2, variant 2                   | gctgtgttgagcaggag     | ccaaagatgatgatgtattgctct    |
| <i>GLRX3</i>              | Glutaredoxin 3                              | tctcaagaaccacgctgt    | tgagaagatatcaaaactgctaaactg |
| <i>GLRX5</i>              | Glutaredoxin 5                              | gtgataactggggcgtgtt   | actcaggcatgcacagca          |
| <i>GPX1 (1)</i>           | Glutathione peroxidase 1, variant 1         | caaccagtttgggcatcag   | gttcacctgcacttctcg          |
| <i>GPX1 (2)</i>           | Glutathione peroxidase 1, variant 2         | ccctgtttgtggttagaacg  | gagagaagggcagctagaacc       |
| <i>GPX2</i>               | Glutathione peroxidase 2                    | gtccttgcttcccttgc     | tgttcaggatctctcattctg       |
| <i>GPX3</i>               | Glutathione peroxidase 3                    | cagagatccttctaccctcaa | ccctttctcaaagactgga         |
| <i>GPX4 (1,2 &amp; 3)</i> | Glutathione peroxidase 4, variants 1, 2 & 3 | tacggaccatggaggag     | ccacacactgtggagctagaa       |
| <i>GPX5 (1 &amp; 2)</i>   | Glutathione peroxidase 5, variants 1 & 2    | tgctttgtgcaaaagaatcc  | ggtgcctttctctgtcttctg       |
| <i>GPX6</i>               | Glutathione peroxidase 6                    | aggcttggcagctcagatc   | gccaacacatgacaccaa          |
| <i>GPX7</i>               | Glutathione peroxidase 7                    | ccatcctgccttcaagtacc  | ttccatcggggctactagg         |

|                            |                                   |                            |                         |
|----------------------------|-----------------------------------|----------------------------|-------------------------|
| <i>GSR</i>                 | Glutathione reductase             | tgccagcttaggaataaccag      | cctgcaccaacaatgacg      |
| <i>PRDX1 (1,2 &amp; 3)</i> | Peroxiredoxin 1, variants 1,2 & 3 | cactgacaaacatggggaagt      | tttgccttttgacatcagg     |
| <i>PRDX2 (1)</i>           | Peroxiredoxin 2, variant 1        | gccttcagttacacagacgag      | gttgggcttaatcgtgtcact   |
| <i>PRDX2 (3)</i>           | Peroxiredoxin 2, variant 3        | gcaactcagatgcaactctatctact | tgaactggagttccatctcat   |
| <i>PRDX3 (1 &amp; 2)</i>   | Peroxiredoxin 3, variants 1 & 2   | ctggacaccggattctcta        | gggtgatctactgattacctctg |
| <i>PRDX4</i>               | Peroxiredoxin 4                   | gcacctaagcaaagcgaaga       | aaattctccatcgtacacagc   |
| <i>PRDX5 (1 &amp; 3)</i>   | Peroxiredoxin 5, variants 1 & 3   | tcctggctgatccactg          | atgccatcctgtaccacat     |
| <i>PRDX5 (2)</i>           | Peroxiredoxin 5, variant 2        | caccctggatgttccaa          | ggacaccagcgaatcatctagt  |
| <i>PRDX6</i>               | Peroxiredoxin 6                   | caatagacagtgttgaggaccatc   | tttctgtggctcttcacaa     |
| <i>SOD1</i>                | Superoxide dismutase 1            | gcatcatcaattcgagcag        | caggccttcagtcagtcctt    |
| <i>SOD2</i>                | Superoxide dismutase 2            | tcactgcaaggaacaacag        | taagcgtgctcccacacat     |
| <i>SOD3</i>                | Superoxide dismutase 3            | ctctcttttcaggagagaaagctc   | aacacagtagcggccagcat    |
| <i>TXN</i>                 | Thioredoxin                       | ttacagccgctcgtcaga         | ggcttctgaaaagcagtcctt   |
| <i>TXN2</i>                | Thioredoxin 2                     | gagacaccagtgggtgtgga       | gcttggccaccatctctc      |
